# Supplementary material
Source: publisher figshare collection journal article supplement (https://sage.figshare.com/ndownloader/files/17566196)
Supplement: Supplementary file 1 [file 17566196]

**Appendix A. Negative Binomial Regression Predicting PHQ Score among Clergy with Interaction Terms (N=1680)**

|                  | <b>Model One: Full Model<br/>without Interaction</b> | <b>Model Two:<br/>Isolated*Women</b> | <b>Model Three: Out-<br/>Degree*Women</b> | <b>Model Four: In-<br/>Degree*Women</b> |
|------------------|------------------------------------------------------|--------------------------------------|-------------------------------------------|-----------------------------------------|
| Constant         | 1.68*<br>(.35)                                       | 1.63*<br>(.36)                       | 1.77*<br>(.37)                            | 1.68*<br>(.35)                          |
| Age              | .99*<br>(.00)                                        | .99*<br>(.00)                        | .99*<br>(.00)                             | .99*<br>(.00)                           |
| White            | 1.27*<br>(.11)                                       | 1.27*<br>(.11)                       | 1.28*<br>(.11)                            | 1.27*<br>(.11)                          |
| Bachelors Degree | 1.16<br>(.14)                                        | 1.16<br>(.14)                        | 1.17<br>(.14)                             | 1.16<br>(.14)                           |
| Masters Degree   | 1.22*<br>(.11)                                       | 1.22*<br>(.11)                       | 1.23*<br>(.11)                            | 1.22*<br>(.11)                          |
| Doctoral Degree  | 1.12<br>(.13)                                        | 1.12<br>(.13)                        | 1.11<br>(.13)                             | 1.12<br>(.13)                           |
| Married          | .97<br>(.07)                                         | .97<br>(.07)                         | .98<br>(.08)                              | .97<br>(.07)                            |
| Rural            | 1.09<br>(.06)                                        | 1.09<br>(.06)                        | 1.09<br>(.06)                             | 1.09<br>(.06)                           |
| Women            | 1.13*<br>(.07)                                       | 1.22<br>(.22)                        | 1.00<br>(.07)                             | 1.13<br>(.08)                           |
| Isolated         | 2.39*<br>(.18)                                       | 2.45*<br>(.22)                       | 2.39*<br>(.18)                            | 2.39*<br>(.18)                          |
| Out-Degree       | .97*<br>(.01)                                        | .97*<br>(.01)                        | .93*<br>(.02)                             | .97*<br>(.01)                           |

|                       |               |               |                |               |
|-----------------------|---------------|---------------|----------------|---------------|
| In-Degree             | 1.01<br>(.01) | 1.01<br>(.01) | 1.01<br>(.01)  | 1.01<br>(.02) |
| Isolated*Women        | --            | .93<br>(.14)  | --             | --            |
| Out-Degree*Women      | --            | --            | 1.08*<br>(.03) | --            |
| In-Degree*Women       | --            | --            | --             | 1.00<br>(.02) |
| Pseudo R <sup>2</sup> | .03           | .03           | .03            | .03           |

*Note:* Table enteries are incident rate ratios (standard errors of estimates are in parentheses)

\*p < .05

## Appendix B. Network of Men Clergy by Depression

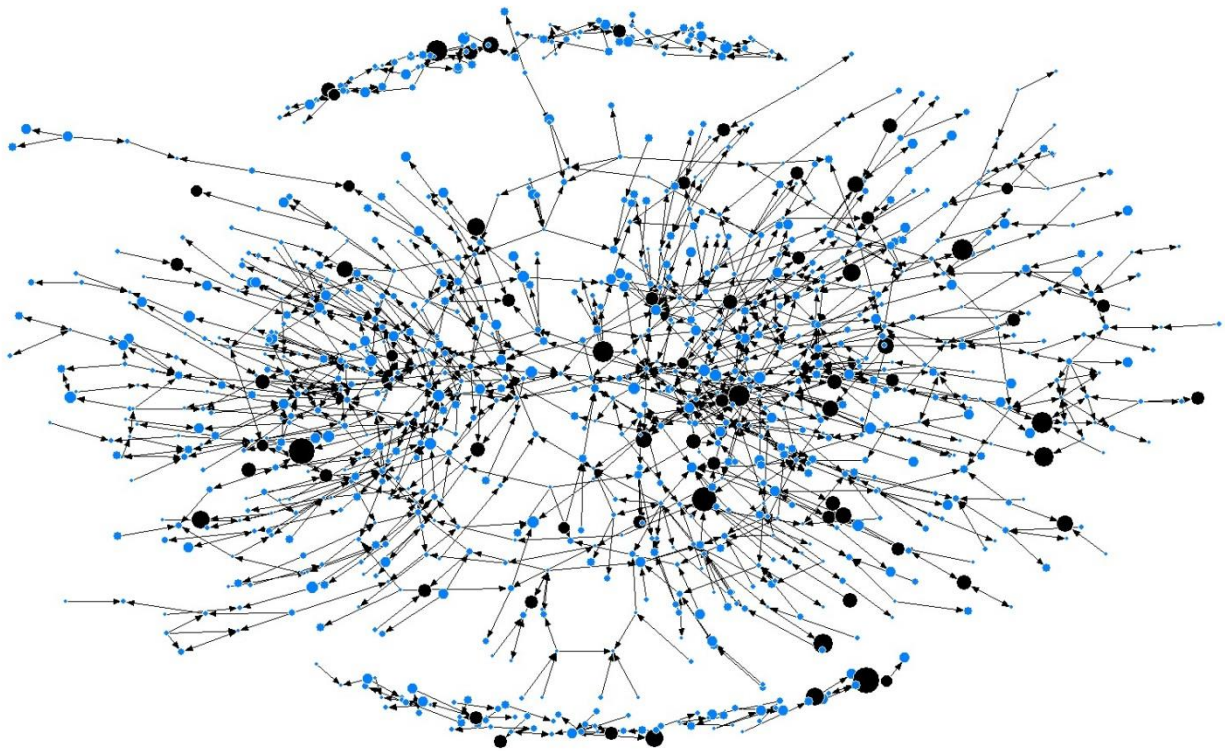

- Non-depressed Men Clergy
- Depressed Men Clergy

*Note:* Node size is a representation of PHQ score with smaller nodes indicating a lower PHQ score and larger nodes indicating a higher PHQ score.

## Appendix C. Network of Women Clergy by Depression

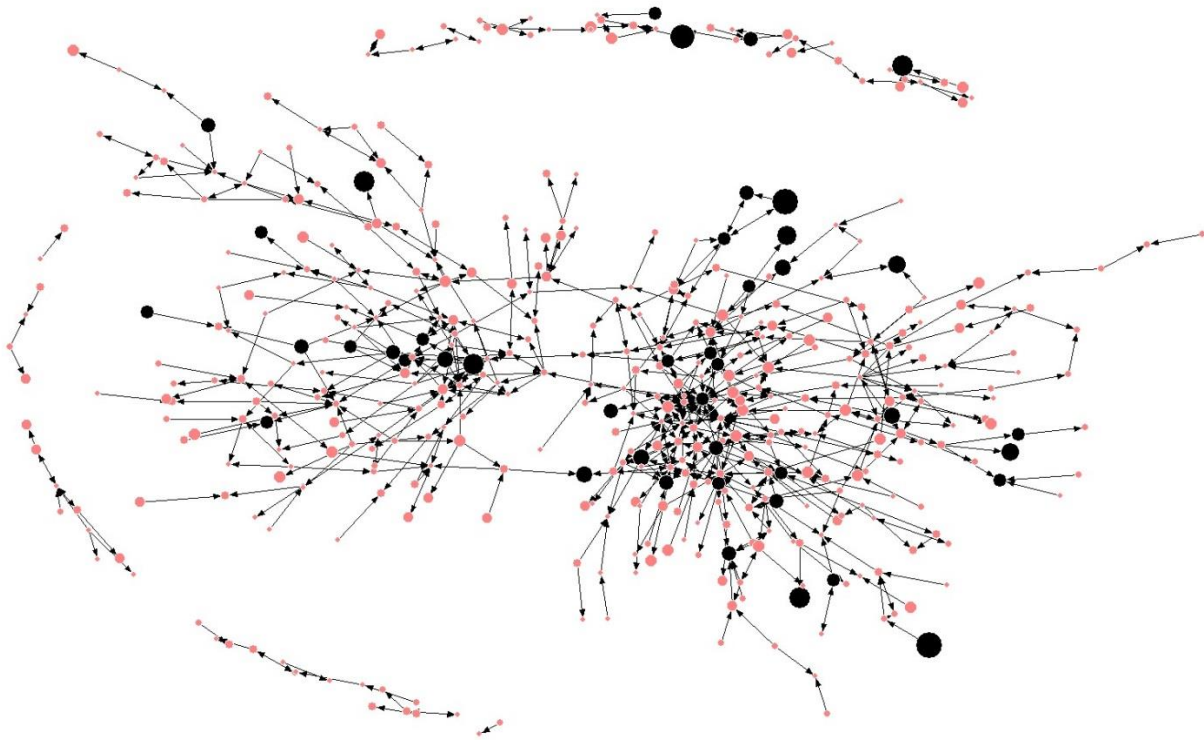

- Non-depressed Women Clergy
- Depressed Women Clergy

*Note:* Node size is a representation of PHQ score with smaller nodes indicating a lower PHQ score and larger nodes indicating a higher PHQ score.
